# Supplementary material for: Comparison of the performance of ITS1 and ITS2 as barcodes in amplicon-based sequencing of bioaerosols
Source: PeerJ journal article supplement (doi:10.7717/peerj.8523), 2020-02-17
Supplement: Supplementary_materials_PeerJ.pdf [file Supplementary_materials_PeerJ.pdf]

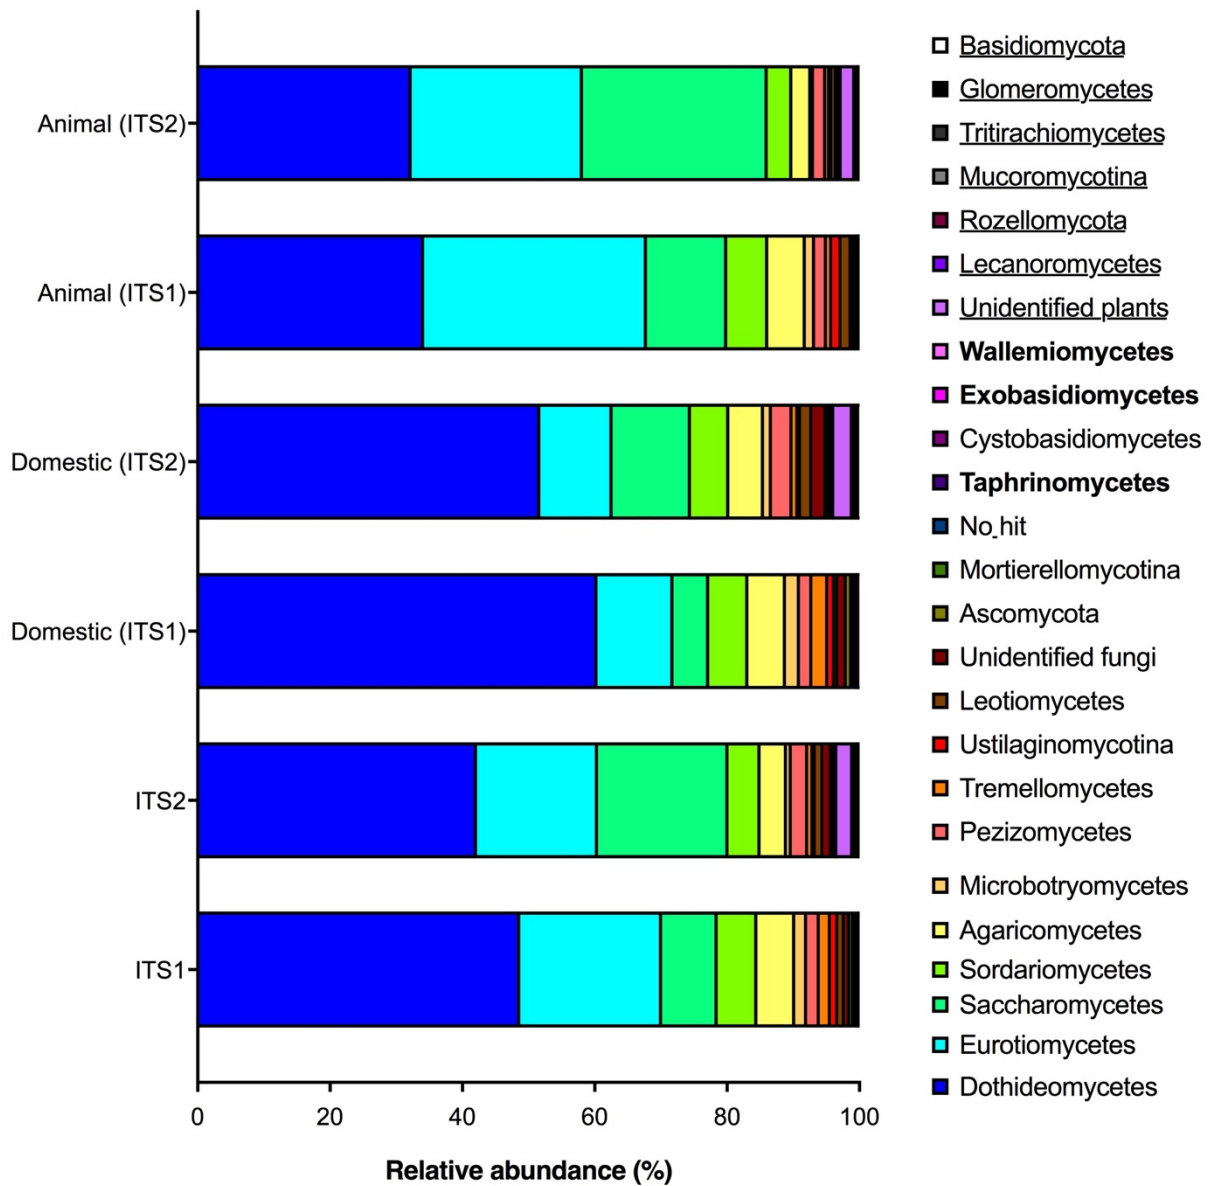

**Figure S1: Relative abundances of fungal classes detected in composting sites by amplicon-based (ITS1 and ITS2) HTS method.**

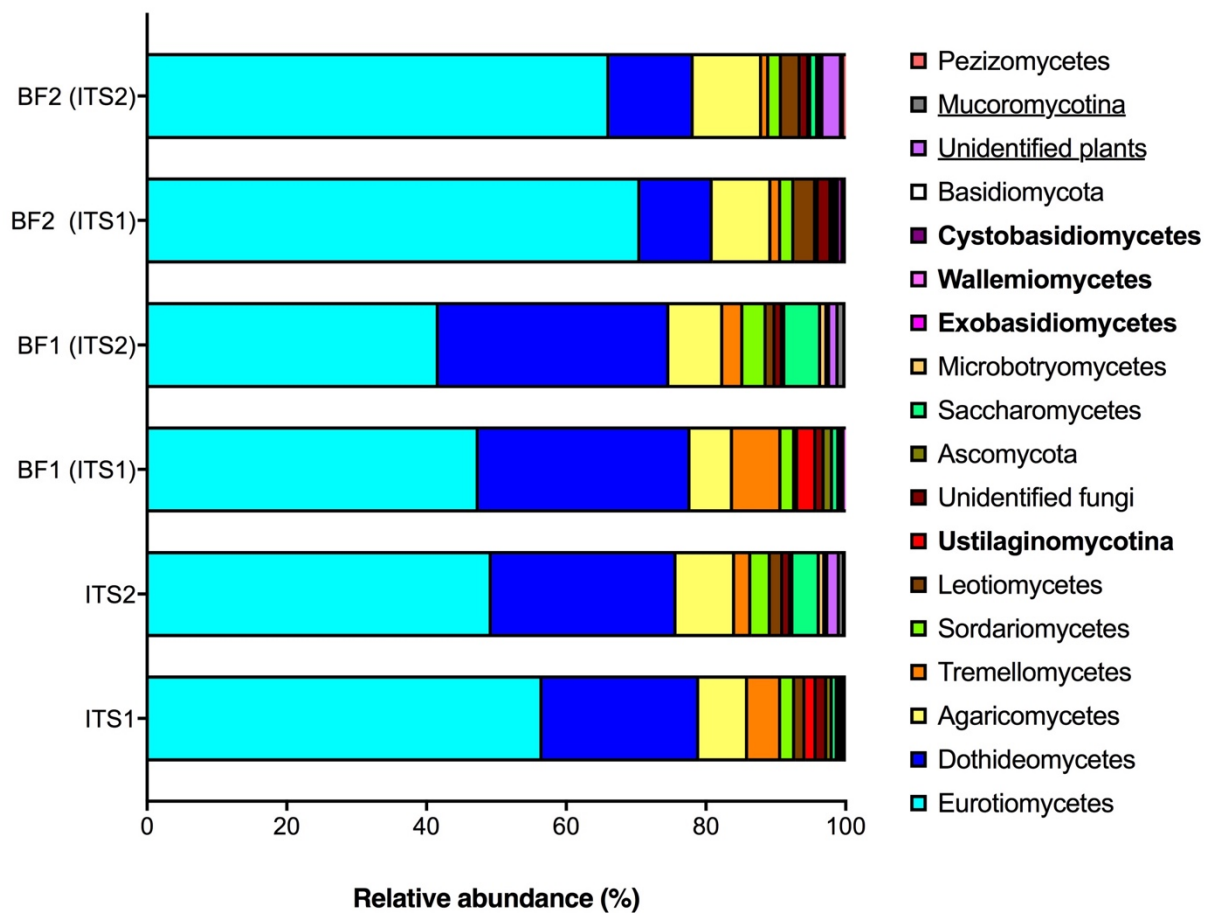

**Figure S2: Relative abundances of fungal classes detected in biomethanization facilities by amplicon-based (ITS1 and ITS2) HTS method.**

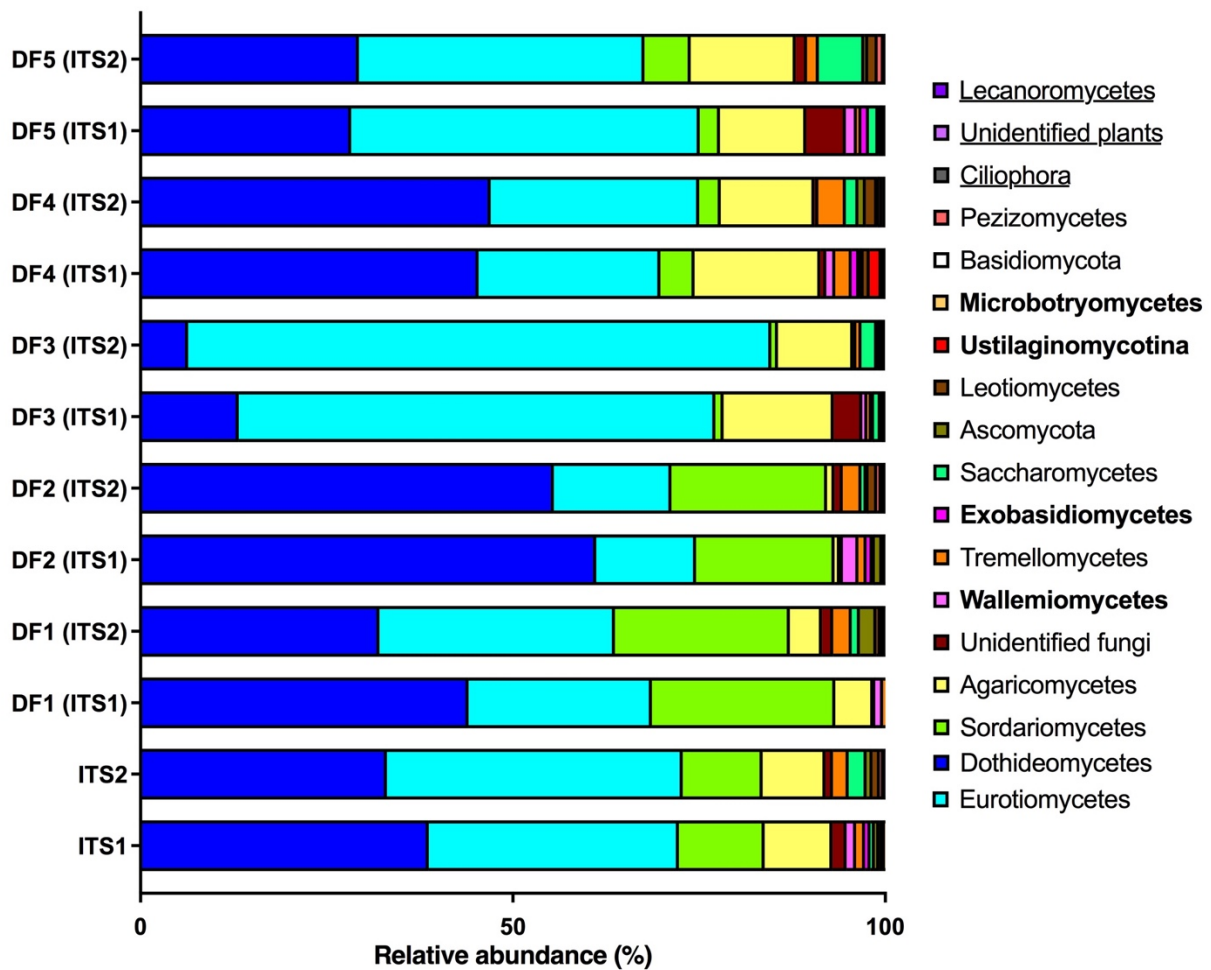

Figure S3: Relative abundances of fungal classes detected in dairy farms by amplicon-based (ITS1 and ITS2) HTS method.

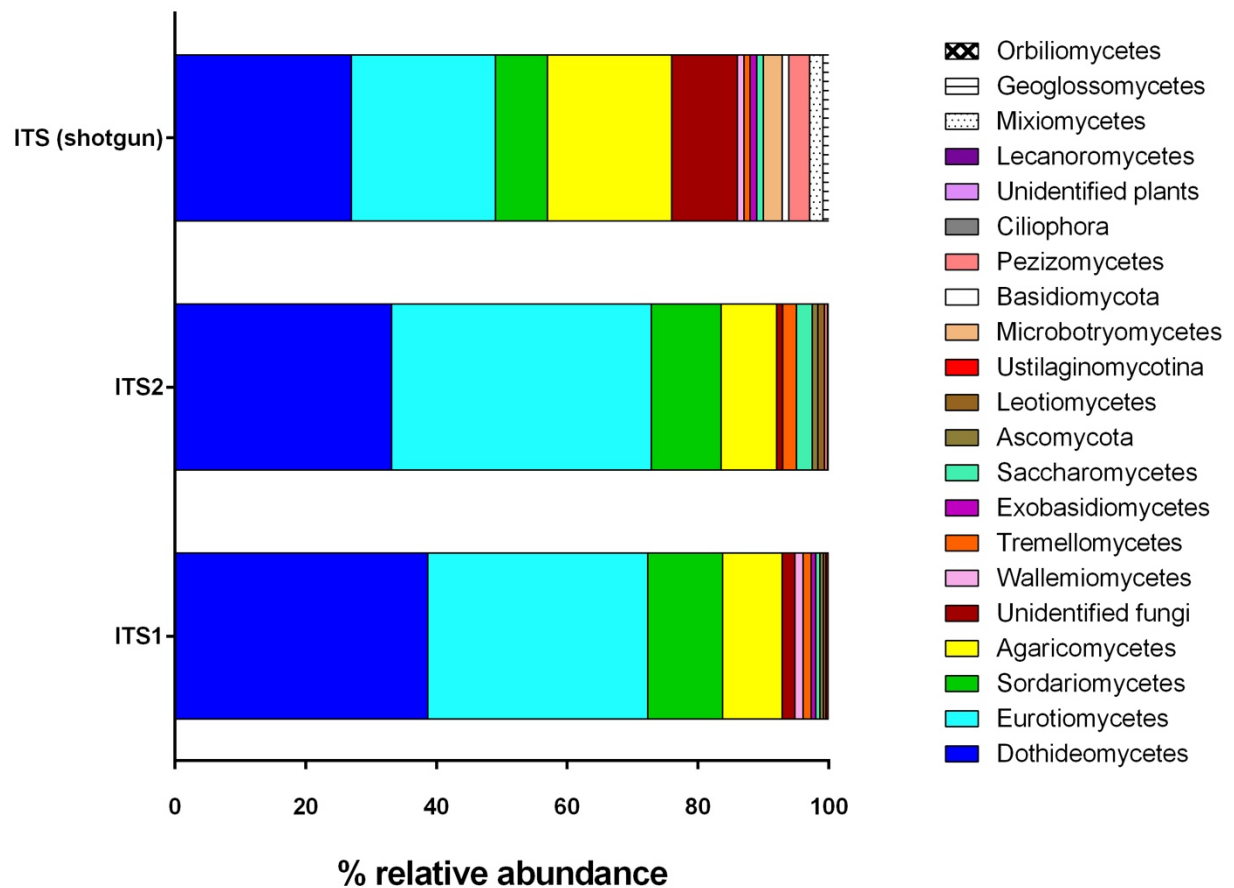

**Figure S4: Relative abundances of fungal classes detected in dairy farms by shotgun and amplicon-based (ITS1 and ITS2) HTS.** The whole ITS region (ITS1-5.8S-ITS2) was extracted from the shotgun metagenomes (ITS-shotgun) and relative abundance was recalculated based on the representative number of sequences.
